# Supplementary material
Source: PubMed Central journal article supplement (PMC5338714)
Supplement: CJN.07600716SupplementaryData1.pdf [file CJN.07600716SupplementaryData1.pdf]

## Author Affiliations:

Peter Schnuelle<sup>\*,¶</sup>, Wilhelm H. Schmitt<sup>\*,¶</sup>, Christel Weiss<sup>§</sup>, Antje Habicht<sup>‡</sup>, Lutz Renders<sup>†</sup>, Martin Zeier<sup>\*\*</sup>, Felix Drüschler<sup>\*\*</sup>, Katharina Heller<sup>¶¶</sup>, Przemyslaw Pisarski<sup>§§</sup>, Bernhard Banas<sup>‡‡</sup>, Bernhard K. Krämer<sup>¶</sup>, Matthias Jung<sup>¶</sup>, Kai Lopau<sup>††</sup>, Christoph J. Olbricht<sup>\*\*\*</sup>, Horst Weihprecht<sup>¶¶¶</sup>, Peter Schenker<sup>§§§</sup>, Johan W. De Fijter<sup>‡‡‡</sup>, Benito A. Yard<sup>¶</sup>, Urs Benck<sup>¶</sup>.

\* Center for Renal Diseases, Weinheim, Germany

¶ Vth Department of Medicine, University Medical Center Mannheim, University of Heidelberg, Germany

§ Department of Biomathematics and Medical Statistics, Mannheim, Germany

‡ Division of Nephrology, Medical Clinic and Polyclinic IV, University of Munich, Munich, Germany

† Department of Nephrology, Technical University of Munich, Munich, Germany

\*\* Division of Nephrology, University Hospital Heidelberg, Heidelberg, Germany

¶¶ Department of Nephrology and Hypertension, Friedrich-Alexander-University Erlangen-Nuremberg, Erlangen, Germany

§§ Department of Surgery, University of Freiburg, Freiburg, Germany

‡‡ Department of Nephrology, University Hospital Regensburg, Regensburg, Germany

†† Department of Internal Medicine I, Division of Nephrology, University of Wuerzburg, Wuerzburg, Germany

\*\*\* Department of Nephrology, Katharinenhospital Stuttgart, Stuttgart, Germany

¶¶¶ Department of Internal Medicine, Klinikum Augsburg, Augsburg, Germany

§§§ Department of Surgery, Ruhr-University Bochum, Bochum, Germany

‡‡‡ Department of Nephrology, Leiden University Medical Center, Leiden, The Netherlands
